# Supplementary material for: Impact of Melatonin Deficit on Emotional Status and Oxidative Stress-Induced Changes in Sphingomyelin and Cholesterol Level in Young Adult, Mature, and Aged Rats
Source: Int J Mol Sci. 2022 Mar 4;23(5):2809. doi: 10.3390/ijms23052809 (PMC8911298; doi:10.3390/ijms23052809)
Supplement: Supplementary file 1 [file ijms-23-02809-s001.zip › ijms-1621021-supplementary.pdf]

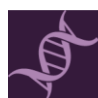

Article

# Impact of Melatonin Deficit on Emotional Status and Oxidative Stress-Induced Changes in Sphingomyelin and Cholesterol Level in Young Adult, Mature, and Aged Rats

Jana Tchekalarova <sup>1,\*</sup>, Zlatina Nenchevska <sup>1</sup>, Lidia Kortenska <sup>1</sup>, Veselina Uzunova <sup>2</sup>, Irina Georgieva <sup>2</sup> and Rumiana Tzoneva <sup>2</sup>

<sup>1</sup> Institute of Neurobiology, Bulgarian Academy of Sciences, Acad. G. Bonchev Street, Block 23, 1113 Sofia, Bulgaria; zuzania@abv.bg (Z.N.); lkortenska@abv.bg (L.K.)

<sup>2</sup> Institute of Biophysics and Biomedical Engineering, Bulgarian Academy of Sciences, Acad. G. Bonchev Street, Block 21, 1113 Sofia, Bulgaria; georgieva.irina5@gmail.com (I.G.); vesi.uzunova@abv.bg (V.U.); tzoneva@bio21.bas.bg (R.T.)

\* Correspondence: jt.chekalarova@inb.bas.bg

**Table S1.** Effects of factors Age, Surgery and Age x Surgery interaction on motor activity, anxiety and depressive-like behavior, measured in the open field (OF) test, sucrose preference test (SPT) and splash test. Two-way analysis of variance was performed followed by a *post hoc* Bonferroni when appropriate.

| Behavioral tests       | Two-way ANOVA                                                                                                                                                  |
|------------------------|----------------------------------------------------------------------------------------------------------------------------------------------------------------|
| OF- Total distance     | Age [ $F_{2, 95} = 27,610$ ; $p < 0.001$ ]<br>Surgery [ $F_{2, 95} = 1,554$ ; $p = 2.18$ ]<br>Age x Surgery interaction [ $F_{2, 95} = 1,918$ ; $p = 0.156$ ]  |
| OF- Number of rearings | Age [ $F_{2, 95} = 10,913$ ; $p < 0.001$ ]<br>Surgery [ $F_{2, 95} = 0,0551$ ; $p = 0.815$ ]<br>Age x Surgery [ $F_{2, 95} = 4,411$ ; $p = 0.017$ ]            |
| OF- Distance center    | Age [ $F_{2, 95} = 21,921$ ; $p < 0.001$ ]<br>Surgery [ $F_{2, 95} = 2,899$ ; $p = 0.095$ ]<br>Age x Surgery interaction [ $F_{2, 95} = 1,898$ ; $p = 0.161$ ] |
| OF- Time center        | Age [ $F_{2, 95} = 14,966$ ; $p < 0.001$ ]<br>Surgery [ $F_{2, 95} = 2,694$ ; $p = 0.108$ ]<br>Age x Surgery interaction [ $F_{2, 95} = 1,626$ ; $p = 0.208$ ] |
| SPT                    | Age [ $F_{2, 95} = 1.012$ ; $p = 0.372$ ]<br>Surgery [ $F_{2, 95} = 6.180$ ; $p = 0.017$ ]<br>Age x Surgery [ $F_{2, 95} = 4.245$ ; $p = 0.021$ ]              |
| Splash test            | Age [ $F_{2, 95} = 1.283$ ; $p = 0.288$ ]<br>Surgery [ $F_{2, 95} = 13.971$ ; $p < 0.001$ ]<br>Age x Surgery interaction [ $F_{2, 95} = 0.172$ ; $p = 0.843$ ] |
| ORT (number of counts) | Age [ $F_{2, 95} = 0,411$ ; $p = 0.525$ ]<br>Surgery [ $F_{2, 95} = 4,314$ ; $p = 0.02$ ]<br>Age x Surgery interaction [ $F_{2, 95} = 0,902$ ; $p = 0.414$ ]   |
| ORT (time)             | Age [ $F_{2, 95} = 14,966$ ; $p < 0.001$ ]<br>Surgery [ $F_{2, 95} = 2,694$ ; $p = 0.108$ ]<br>Age x Surgery interaction [ $F_{2, 95} = 1,626$ ; $p = 0.208$ ] |

**Table S2.** Effects of factors Age, Surgery and Age x Surgery interaction on oxidative stress markers, superoxide dismutase (SOD), glutathione (GSH), malondialdehyde (MDA). Two-way analysis of variance was performed followed by a *post hoc* Bonferroni when appropriate.

| Oxidative stress |                                                      |
|------------------|------------------------------------------------------|
| SOD              | Age [ $F_{2, 95} = 5,468$ ; $p = 0.011$ ]            |
|                  | Surgery [ $F_{2, 95} = 6.135$ ; $p = 0.021$ ]        |
|                  | Age x Surgery [ $F_{2, 95} = 0.0337$ ; $p = 0.967$ ] |
| GSH              | Age [ $F_{2, 95} = 1,009$ ; $p = 0.382$ ]            |
|                  | Surgery [ $F_{2, 95} = 5,198$ ; $p = 0.038$ ]        |
|                  | Age x Surgery [ $F_{2, 95} = 0.194$ ; $p = 0.324$ ]  |
| MDA              | Age [ $F_{2, 95} = 31,534$ ; $p < 0.001$ ]           |
|                  | Surgery [ $F_{2, 95} = 4,28$ ; $p = 0.0037$ ]        |
|                  | Age x Surgery [ $F_{2, 95} = 1.427$ ; $p = 0.248$ ]  |
